# Supplementary material for: Synthesis, Properties and Spatial Structure of 4-[(3,5-Dimethyl-1,2-oxazol-4-yl)sulfonyl]cytisine
Source: MDPI journal article supplement (doi:10.3390/plants12010137), 2022-12-27
Supplement: s1 [file s1]

## Supporting information

# Synthesis, Properties and Spatial Structure of 4-[(3,5-Dimethyl-1,2-oxazol-4-yl)sulfonyl]cytisine

Marat K. Ibrayev <sup>1,2,\*</sup>, Oralgazy A. Nurkenov <sup>1,3</sup>, Zhanara B. Rakhimberlinova <sup>1</sup>, Altynaray T. Takibayeva <sup>1</sup>, Dastan M. Turdybekov <sup>1</sup>, Tulegen M. Seilkhanov <sup>4</sup>, Meruyert B. Issabayeva <sup>5,\*</sup>, Assel A. Kelmyalene <sup>1</sup>, Assel T. Kezdikbayeva <sup>2</sup> and Anel Z. Mendibayeva <sup>3</sup>

<sup>1</sup> Abylkas Saginov Karaganda Technical University, Ave. N. Nazarbayev, 56, Karaganda 100027, Kazakhstan

<sup>2</sup> Faculty of Chemistry, Karaganda Buketov University, st. University 28, Karaganda 100024, Kazakhstan

<sup>3</sup> Institute of Organic Synthesis and Coal Chemistry of Republic of Kazakhstan, st. Alikhanov, 1, Karaganda 100008, Kazakhstan

<sup>4</sup> Laboratory of Engineering Profile NMR Spectroscopy, Sh. Ualikhanov Kokshetau University, Kokshetau 020008, Kazakhstan

<sup>5</sup> School of Pharmacy, Medical University of Karaganda, Karaganda 100008, Kazakhstan

\* Correspondence: mkibr@mail.ru (M.K.I.); missabaeva@mail.ru (M.B.I.);  
Tel.: +7-700-3106646 (M.K.I.)

## Table of contents

|                                                         |    |
|---------------------------------------------------------|----|
| <a href="#">Experimental</a> .....                      | 1  |
| <a href="#">General Information</a> .....               | 1  |
| <a href="#">Experimental Procedures</a> .....           | 2  |
| <a href="#">Spectroscopic and physical data</a> .....   | 3  |
| <a href="#">Copies of NMR Spectra of Products</a> ..... | 4  |
| <a href="#">Copies of MS Spectra of Products</a> .....  | 12 |
| <a href="#">X-Ray Structural Study of Product</a> ..... | 13 |

## Experimental

### General Information

FTIR spectra were obtained with an Agilent Cary 630 spectrophotometer in a thin sample layer on a crystal attachment. <sup>1</sup>H and <sup>13</sup>C NMR spectra were recorded on JNM-ECA Jeol 400 spectrometer (frequency 399.78 and 100.53 MHz, respectively) with using of CDCl<sub>3</sub> solvent. The chemical shifts have been measured relative to signals of residual protons or carbon atoms of deuterated chloroform.

Chromato-mass spectrometric studies were carried out on a Trace GC Ultra chromatograph with a DSQ II mass-selective detector in the electron ionization mode (70 eV) on a Thermo TR-5 MS quartz capillary column, 15 m long, 0.25 mm inner diameter, with a film thickness of the stationary phase of 0.25 μm. Splitless input mode was used. Carrier gas discharge 20 ml/min. The velocity of the carrier gas (helium) is 1 ml/min. Evaporator temperature 200°C, transition chamber temperature 200°C, ion source temperature 200°C. The temperature of the column thermostat was changed according to the program: from 15 (5 min delay) to 220°C at a rate of 20°C per minute, to 290° at a rate of 15° per minute. The total analysis time was 30 min. The volume of the injected sample is 1 μl. Chromatograms were recorded in TIC mode. The range of mass scanning is 30 - 450 amu.

Melting points were determined using a Stuart SMP10 hot bench. Monitoring of the reaction course and the purity of the products was carried out by TLC on Sorbfil plates and visualized using iodine vapor or UV light.

## Experimental Procedures

**3,5-Dimethylisoxazole-4-sulfonyl chloride (1).** To a cooled mixture of 33.8 mL of a chlorosulfonic acid and 4.06 mL of thionyl chloride, 5 mL of 3,5-dimethylisoxazole has been slowly added under stirring. A reaction mixture under stirring has been slowly heated to 120-130°C for 4 h.

The reaction mixture has been cooled to a room temperature and poured over 100 g of ice (be careful when added to ice, a reaction mixture can react vigorously with water).

The precipitated white residue has been filtered, washed with water and dissolved in 30 ml of chloroform. Solution has been washed with 40 ml of potassium carbonate 5% solution and dried over calcium chloride. Product (9) has been obtained as the white crystals. Its yield has been 2.28 g, m.p. 40-2°C.

**4-[(3,5-dimethyl-1,2-oxazol-4-yl)sulfonyl]cytisine (2).** To a solution of 1.9 g (0.01 mol) of cytisine and 1.18 g (0.015 mol) of pyridine in 3 ml of dry acetonitrile, 1.95 g (0.01 mol) of sulfochloride 2 in 10 ml of dry acetonitrile has been added at a room temperature. A color of a reaction mixture has been light yellow, and its residue has been yellow. A reaction mixture has been stirred for 1 h at 40°C. Then a reaction mixture has been cooled. A yellow residue has been filtered and washed with acetonitrile. Then a solvent has been distilled with using a rotary evaporator. A residue has been thick yellow oil. Then 20 ml of a 5% solution of potassium carbonate has been added to a residue. After grinding, the thick oil has been a yellowish powder. The yield of product 2 has been 83%, m.p. 141-142°C.

**4-[(3-methyl-5-[(4-chlorophenyl)ethenyl]-1,2-oxazol-4-yl)sulfonyl]cytisine (3).** To a solution of 0.91 g of sulfonamide 2 and 0.56 g of 4-chlorobenzaldehyde in 20 ml of ethanol, 2 ml of a 40% aqueous solution of potassium hydroxide has been added at a room temperature. A color of a reaction mixture has been cloudy, and then has become light yellow. A reaction mixture has been stirred and heated for 1 h at 60-70°C. Then, a reaction mixture has been cooled to a room temperature and added 15% hydrochloric acid solution to pH≤3. A residue has been filtered and washed with water. The residue was a hygroscopic substance, light yellow color, m.p. 217-219°C.

## Spectroscopic and physical data

|                                                                                                                                                                                              |                                                                                                                                                                                                                                                                                                                                                                                                                                                                                                                                                                                                                                                                                                                                                                                                                                                                                                                                                                                                                    |
|----------------------------------------------------------------------------------------------------------------------------------------------------------------------------------------------|--------------------------------------------------------------------------------------------------------------------------------------------------------------------------------------------------------------------------------------------------------------------------------------------------------------------------------------------------------------------------------------------------------------------------------------------------------------------------------------------------------------------------------------------------------------------------------------------------------------------------------------------------------------------------------------------------------------------------------------------------------------------------------------------------------------------------------------------------------------------------------------------------------------------------------------------------------------------------------------------------------------------|
| 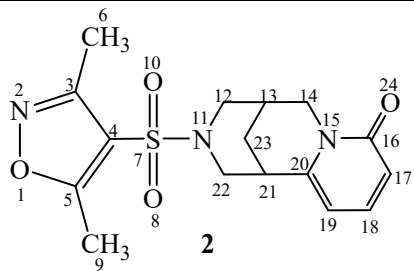 <p><b>2</b></p> <p>Chemical Formula: <math>C_{16}H_{19}N_3O_4S</math><br/>Molecular Weight: 349,41</p>     | <p><b>4-[(3,5-dimethyl-1,2-oxazol-4-yl)sulfonyl]-cytisine (2).</b><br/>Yield: 83%; yellowish powder, mp. 141-142 °C (2-PrOH).<br/><math>^1H</math> NMR (399.78 MHz, DMSO-<math>d_6</math>, <math>\delta</math>, ppm, <math>J</math>/Hz): 1.76-1.85 m (2H, H-23ax,23eq), 2.49 s (4H, H-9,9,9,13), 2.83 d (1H, H-12ax, 2J 11.4 Hz), 2.92 d (1H, H-12eq, 2J 11.4 Hz), 3.22 s (1H, H-21), 3.56 d (1H, H-22ax, 2J 10.8 Hz), 3.61 d (1H, H-22eq, 2J 10.8 Hz), 3.73-3.83 m (2H, H-14ax,14eq) ppm. 6.30 br. s (1H, H-17), 6.36 d (1H, H-19, 3J 9.2 Hz), 7.43 t (1H, 2J 6.6 Hz) ppm. H-6,6,6 2.12 ppm, H-9,9,9 2.49 ppm.<br/><math>^{13}C</math> NMR (100.53 MHz, DMSO-<math>d_6</math>) <math>\delta</math> ppm 24.07 (C-23), 26.59 (C-13), 33.60 (C-21), 49.70 (C-14), 51.20 (C-22), 52.61 (C-12), 106.91 (C-19), 115.90 (C-17), 140.37 (C-18), 150.60 (C-20) и 162.45 (C-16) м.д.. 11.04 (C-6), 12.95 (C-9), 113.30 (C-4), 158.21 (C-3) и 174.45 (C-5).</p>                                                              |
|  <p><b>3</b></p> <p>Chemical Formula: <math>C_{23}H_{22}ClN_3O_4S</math><br/>Molecular Weight: 471,96</p> | <p><b>4-[(3-methyl-5-[(4-chlorophenyl)ethenyl]-1,2-oxazol-4-yl)sulfonyl]cytisine (3).</b> Yield: 76%; Hygroscopic substance, light yellow color, mp 217-219 °C (2-PrOH).<br/><math>^1H</math> NMR (399.78 MHz, DMSO-<math>d_6</math>, <math>\delta</math>, ppm, <math>J</math>/Hz): 1.74-1.77 m (2H, H-31ax,31eq), 2.45 s (1H, H-21), 2.81 d (1H, H-20ax, 2J 11.6 Hz), 2.91 d (1H, H-20eq, 2J 11.6 Hz), 3.17 s (1H, H-29), 3.29-3.83 m (H-22ax,22eq,30ax,30eq) ppm. 6.15-6.17 m (1H, H-27), 6.22-6.24 m (1H, H-25), 7.30-7.33 m (1H, H-26) ppm. H-16,16,16 - 2.50 s, H-10,12 - 7.46-7.49, H-9,13 - 7.69-7.71 ppm.<br/><math>^{13}C</math> NMR (100.53 MHz, DMSO-<math>d_6</math>) <math>\delta</math> ppm 24.12 (C-31), 26.75 (C-21), 33.87 (C-29), 49.27 (C-30), 51.07 (C-22), 52.80 (C-20), 105.65 (C-27), 117.13 (C-25), 140.08 (C-26), 150.11 (C-28) и 162.62 (C-24), 13.01 (C-16), 112.57 (C-4), 129.58 (C-6), 130.28 и 131.64 (C-9,10,12,13), 133.96 (C-11), 138.52 (C-7,8), 150.11 (C-3), 158.52 (C-5).</p> |

## Copies of NMR Spectra of Products

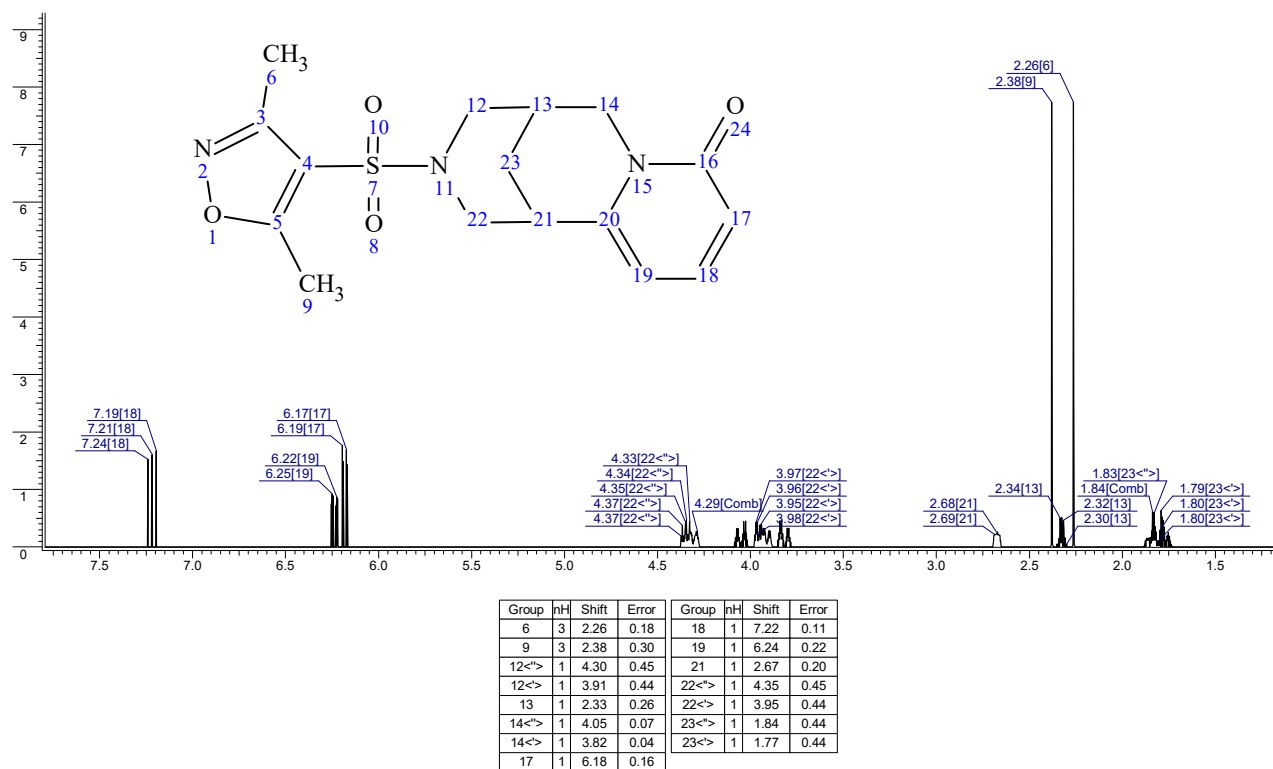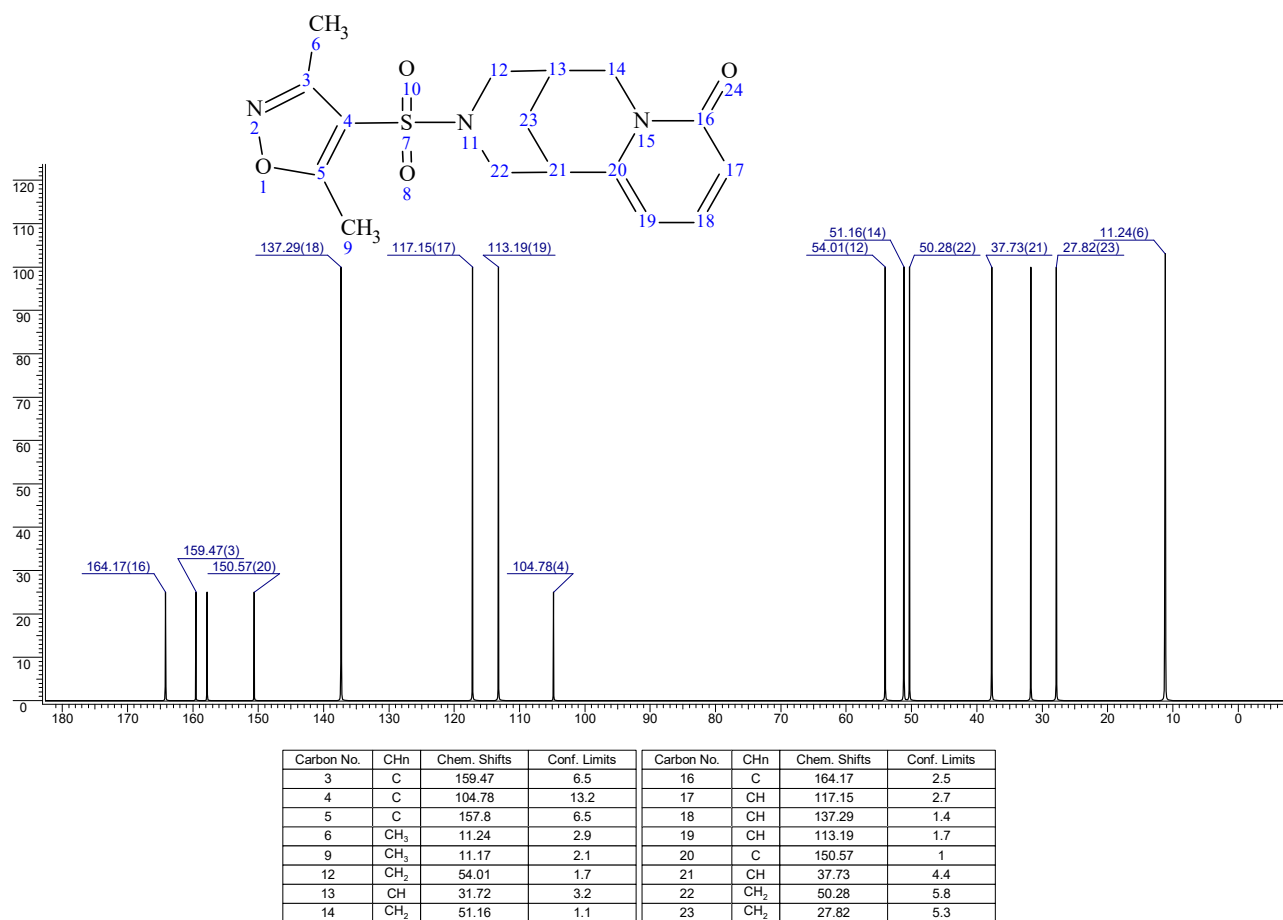

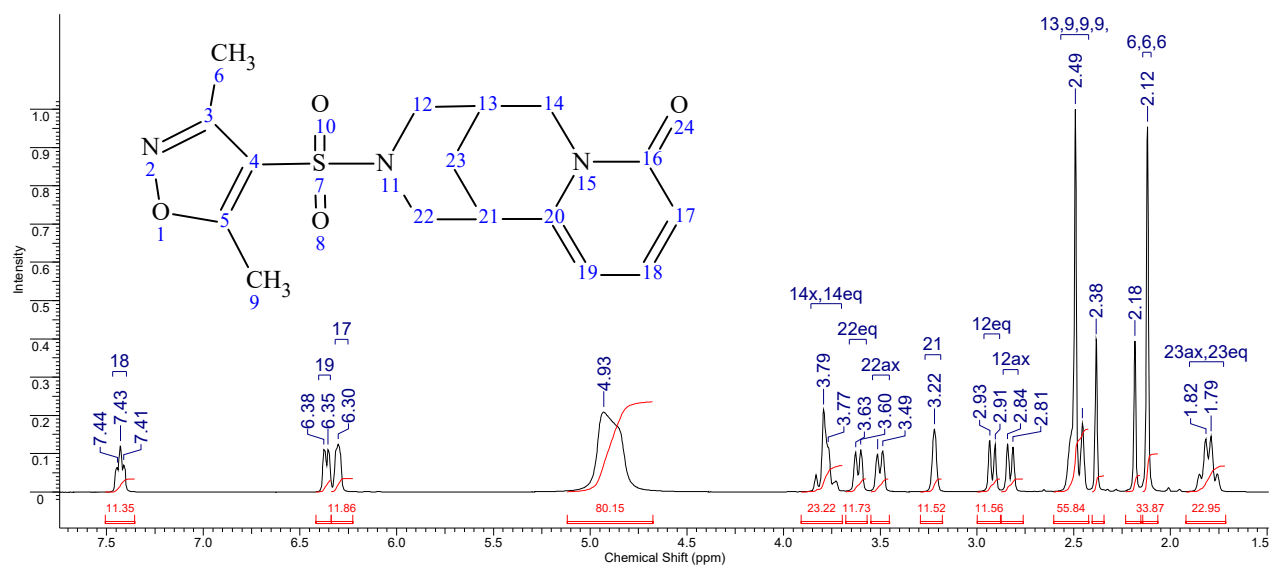

| No. | (ppm) | (Hz)   | Height | No. | (ppm) | (Hz)   | Height | No. | Annotation | (ppm)          | No. | (ppm)          | Value  | Absolute Value | No. | (ppm)          | Value  | Absolute Value |
|-----|-------|--------|--------|-----|-------|--------|--------|-----|------------|----------------|-----|----------------|--------|----------------|-----|----------------|--------|----------------|
| 1   | 1.79  | 715.7  | 0.1453 | 14  | 3.51  | 1405.0 | 0.0976 | 1   | 23ax,23eq  | [1.72 .. 1.90] | 1   | [6.34 .. 6.42] | 11.168 | 1.09728e+1     | 9   | [2.34 .. 2.40] | 14.147 | 1.39000e+1     |
| 2   | 1.82  | 726.3  | 0.1379 | 15  | 3.60  | 1439.3 | 0.1106 | 2   | 6,6,6      | [2.10 .. 2.14] | 2   | [7.36 .. 7.51] | 11.354 | 1.11557e+1     | 10  | [2.15 .. 2.23] | 14.747 | 1.44893e+1     |
| 3   | 2.12  | 847.2  | 0.9546 | 16  | 3.63  | 1450.3 | 0.1028 | 3   | 13,9,9,9   | [2.42 .. 2.57] | 3   | [3.45 .. 3.55] | 11.492 | 1.12911e+1     | 11  | [1.71 .. 1.92] | 22.950 | 2.25498e+1     |
| 4   | 2.18  | 872.8  | 0.3948 | 17  | 3.77  | 1506.6 | 0.1168 | 4   | 12ax       | [2.79 .. 2.86] | 4   | [3.18 .. 3.29] | 11.517 | 1.13161e+1     | 12  | [3.70 .. 3.91] | 23.218 | 2.28124e+1     |
| 5   | 2.38  | 953.0  | 0.3988 | 18  | 3.79  | 1516.2 | 0.2145 | 5   | 12eq       | [2.88 .. 2.96] | 5   | [2.76 .. 2.87] | 11.548 | 1.13464e+1     | 13  | [2.07 .. 2.14] | 33.871 | 3.32797e+1     |
| 6   | 2.45  | 981.4  | 0.1787 | 19  | 4.93  | 1970.5 | 0.2085 | 6   | 21         | [3.19 .. 3.27] | 6   | [2.88 .. 3.00] | 11.563 | 1.13607e+1     | 14  | [2.42 .. 2.60] | 55.839 | 5.48642e+1     |
| 7   | 2.49  | 996.0  | 1.0000 | 20  | 6.30  | 2519.6 | 0.1246 | 7   | 22ax       | [3.45 .. 3.54] | 7   | [3.57 .. 3.68] | 11.731 | 1.15266e+1     | 15  | [4.67 .. 5.12] | 80.147 | 7.87480e+1     |
| 8   | 2.81  | 1124.7 | 0.1171 | 21  | 6.35  | 2540.2 | 0.1100 | 8   | 22eq       | [3.57 .. 3.66] | 8   | [6.23 .. 6.34] | 11.861 | 1.16539e+1     |     |                |        |                |
| 9   | 2.84  | 1136.1 | 0.1251 | 22  | 6.38  | 2549.4 | 0.1107 | 9   | 14x,14eq   | [3.70 .. 3.86] |     |                |        |                |     |                |        |                |
| 10  | 2.91  | 1161.8 | 0.1235 | 23  | 7.41  | 2962.9 | 0.0703 | 10  | 17         | [6.25 .. 6.32] |     |                |        |                |     |                |        |                |
| 11  | 2.93  | 1172.8 | 0.1339 | 24  | 7.43  | 2969.8 | 0.1198 | 11  | 19         | [6.34 .. 6.40] |     |                |        |                |     |                |        |                |
| 12  | 3.22  | 1287.3 | 0.1637 | 25  | 7.44  | 2976.2 | 0.0634 | 12  | 18         | [7.40 .. 7.47] |     |                |        |                |     |                |        |                |
| 13  | 3.49  | 1394.4 | 0.1066 |     |       |        |        |     |            |                |     |                |        |                |     |                |        |                |

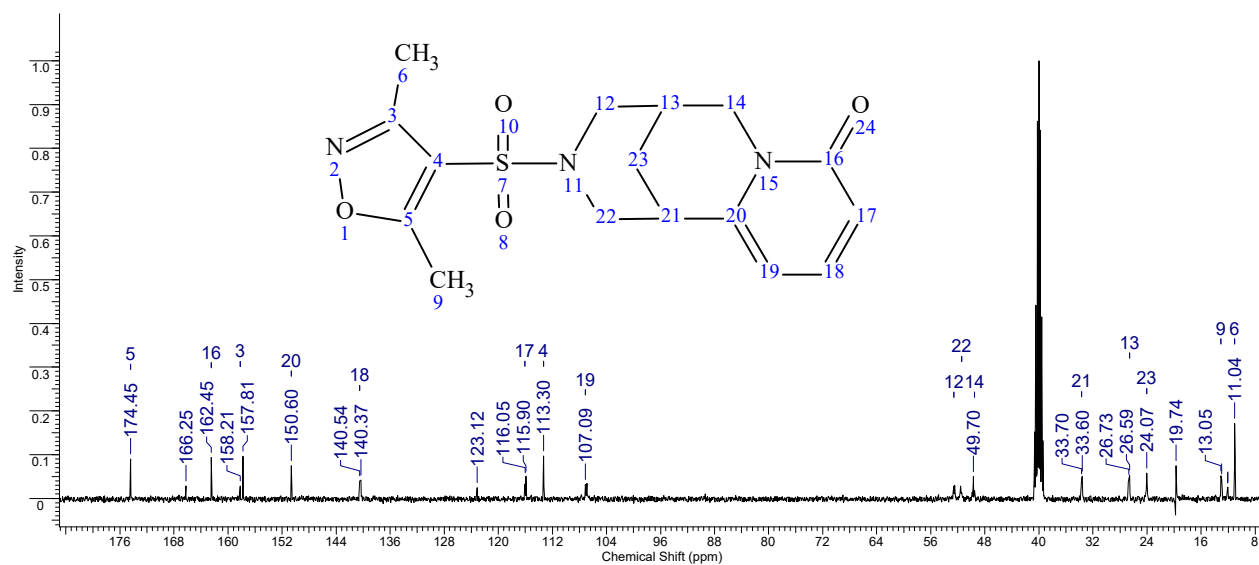

| No. | (ppm)  | (Hz)    | Height | No. | (ppm)  | (Hz)    | Height | No. | Annotation | (ppm) | No. | Annotation | (ppm)  |
|-----|--------|---------|--------|-----|--------|---------|--------|-----|------------|-------|-----|------------|--------|
| 1   | 11.04  | 1110.0  | 0.1713 | 14  | 113.30 | 11389.6 | 0.0970 | 1   | 6          | 11.04 | 9   | 19         | 107.09 |
| 2   | 12.02  | 1208.8  | 0.0255 | 15  | 115.90 | 11651.3 | 0.0510 | 2   | 9          | 13.05 | 10  | 4          | 113.30 |
| 3   | 12.11  | 1217.4  | 0.0234 | 16  | 116.05 | 11665.6 | 0.0474 | 3   | 23         | 24.07 | 11  | 17         | 116.07 |
| 4   | 12.95  | 1301.7  | 0.0442 | 17  | 123.12 | 12376.8 | 0.0251 | 4   | 13         | 26.59 | 12  | 18         | 140.54 |
| 5   | 13.05  | 1312.3  | 0.0518 | 18  | 140.37 | 14110.7 | 0.0415 | 5   | 21         | 33.70 | 13  | 20         | 150.60 |
| 6   | 19.74  | 1984.2  | 0.0748 | 19  | 140.54 | 14127.9 | 0.0396 | 6   | 14         | 49.53 | 14  | 3          | 158.21 |
| 7   | 24.07  | 2419.3  | 0.0577 | 20  | 150.60 | 15139.1 | 0.0752 | 7   | 22         | 51.45 | 15  | 16         | 162.45 |
| 8   | 26.59  | 2673.3  | 0.0535 | 21  | 157.81 | 15863.7 | 0.0959 | 8   | 12         | 52.61 | 16  | 5          | 174.45 |
| 9   | 26.73  | 2686.7  | 0.0435 | 22  | 158.21 | 15904.0 | 0.0287 |     |            |       |     |            |        |
| 10  | 33.60  | 3377.8  | 0.0509 | 23  | 162.45 | 16330.5 | 0.0934 |     |            |       |     |            |        |
| 11  | 33.70  | 3387.4  | 0.0441 | 24  | 166.25 | 16712.0 | 0.0280 |     |            |       |     |            |        |
| 12  | 49.70  | 4995.7  | 0.0499 | 25  | 174.45 | 17536.2 | 0.0897 |     |            |       |     |            |        |
| 13  | 107.09 | 10765.6 | 0.0320 |     |        |         |        |     |            |       |     |            |        |

**Figure S1.**  $^1\text{H}$  (399.78 MHz, DMSO- $d_6$ ) and  $^{13}\text{C}$  (100.53 MHz, DMSO- $d_6$ ) NMR Spectra of **2**

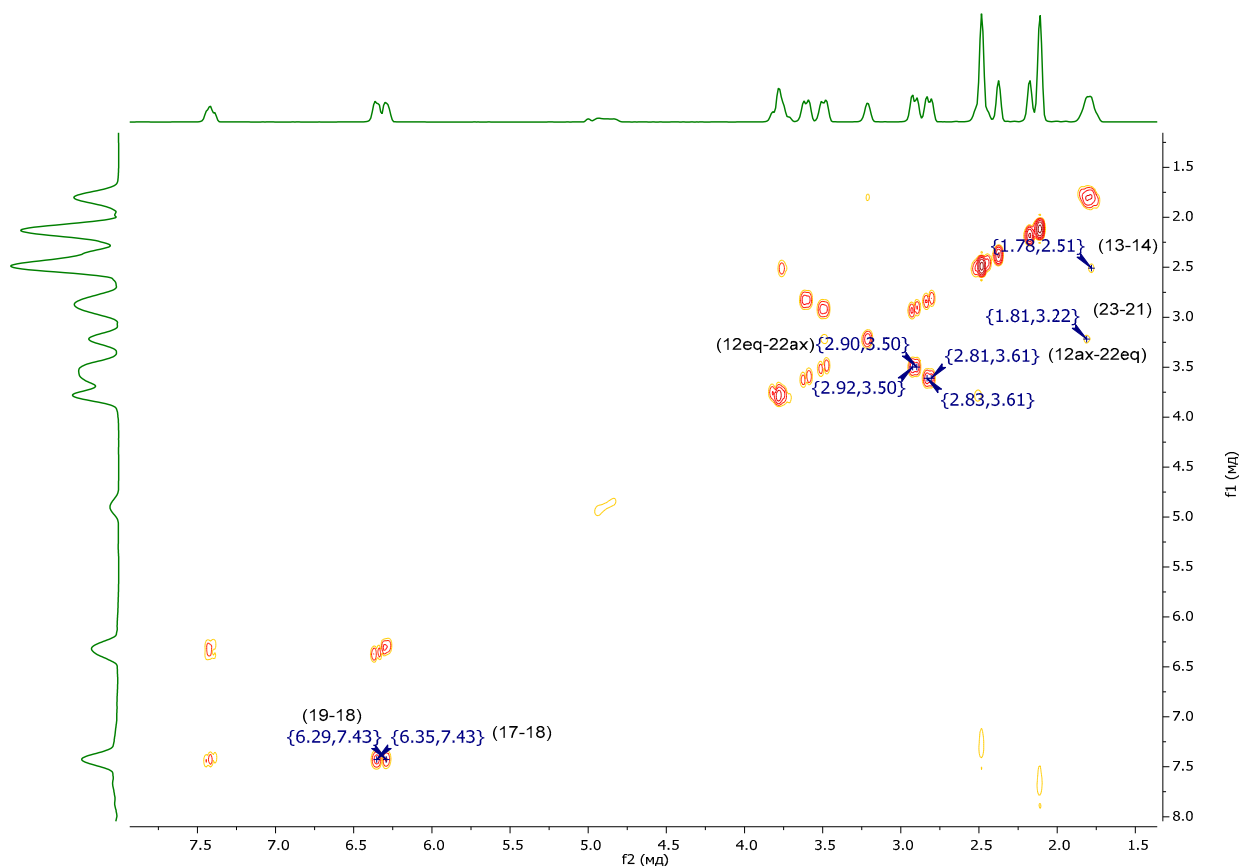

Figure S2. Cosy of 2 in\_DMSO

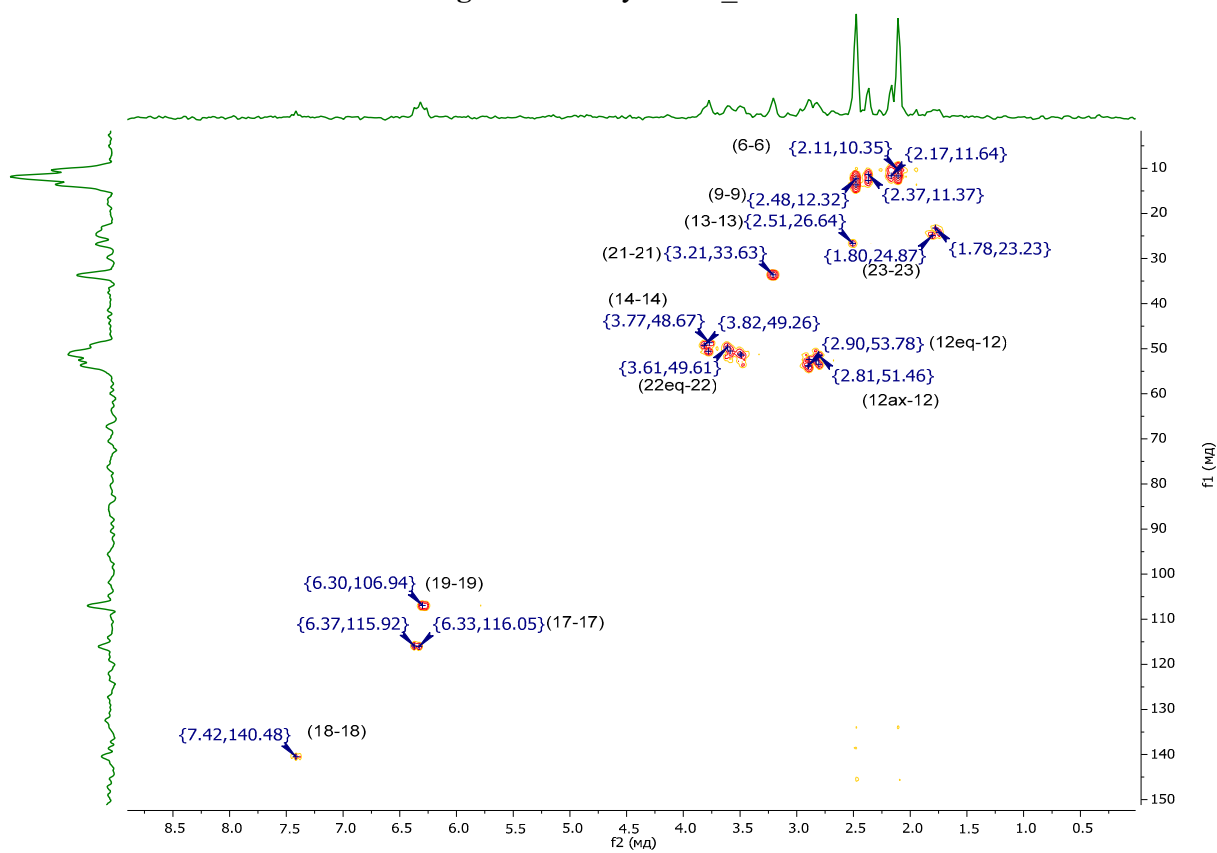

Figure S3 Hmqc of 2 in\_DMSO

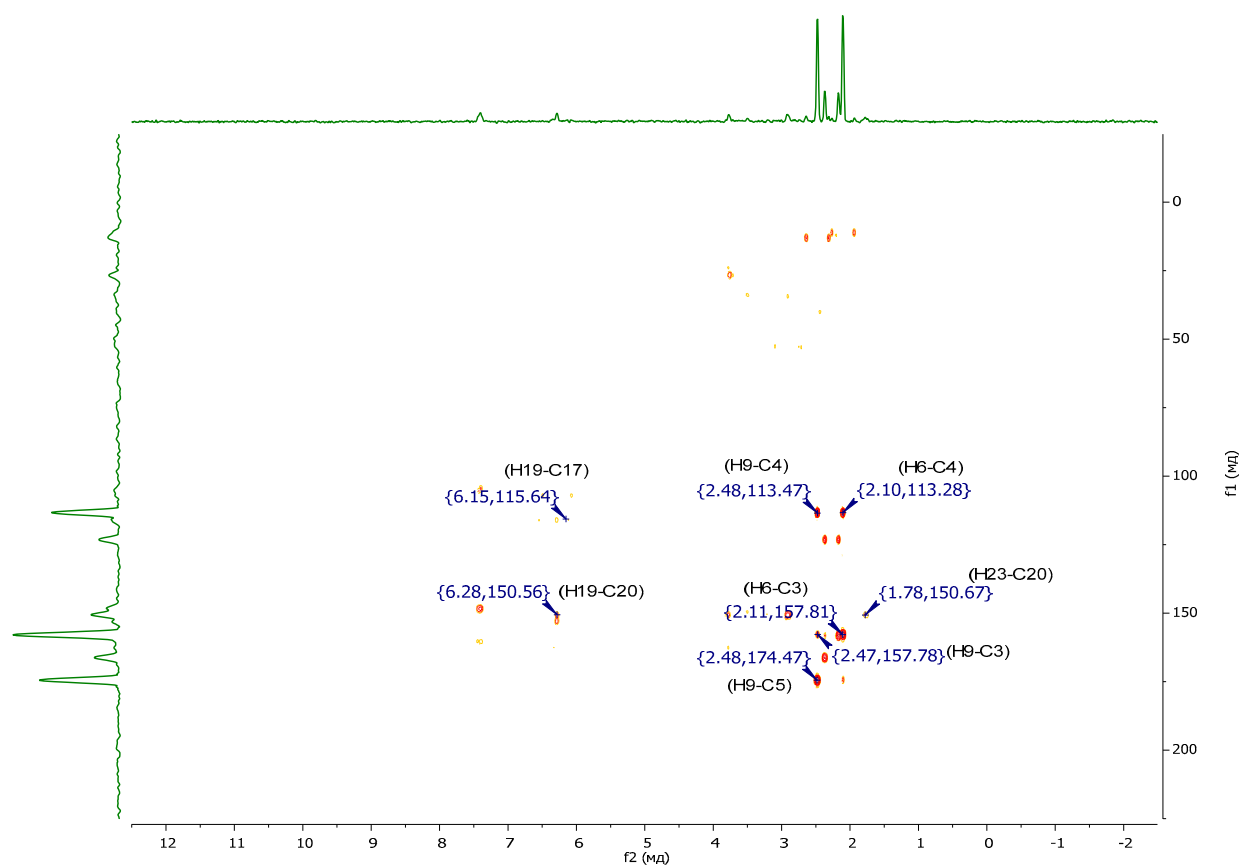

Figure S4. Hmbc of 2 in\_DMSO

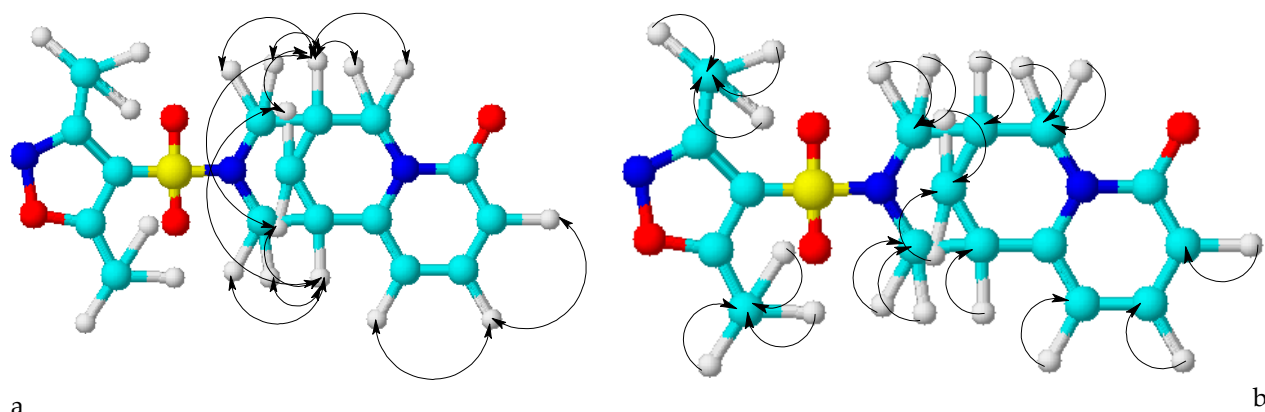

**Figure S5.** The structural correlations in COSY (a) and HMQC (b) spectra of compound **2**

The  $^1\text{H}$ - $^1\text{H}$  COSY spectra of compound **2** have demonstrated the spin-spin correlations through three proton bonds of near methylene-methylene, methine-methylene and methine-methine groups of H23-H21 (1.80, 3.21 and 3.21, 1.80), H13-H14 (2.50, 3.76 and 3.76, 2.50), H12ax-H22eq (2.81, 3.60 and 3.60, 2.81), H12eq-H22ax (2.90, 3.49 and 3.49, 3.49), H19-H18 (6.28, 7.42 and 7.42, 6.28) and H17-H18 (6.31, 7.41 and 7.41, 6.31) ppm.

Hetero-nuclear couplings of protons with carbon atoms through a single bond have been established by  $^1\text{H}$ - $^{13}\text{C}$  HMQC spectroscopy for the following pairs in a compound: H6-C6 (2.10, 11.37), H9-C9 (2.47, 12.85), H23-C23 (1.79, 24.74), H13-C13 (2.50, 26.87), H21-C21 (3.20, 33.83), H12ax-C12 (2.81, 52.89), H12eq-C12 (2.93, 52.44), H22ax-C22 (3.46, 51.14), H22eq-C22 (3.60, 51.38), H14-C14 (3.76, 50.01), H19-C19 (6.28, 107.35), H17-C17 (6.34, 116.27) and H18-C18 (7.42, 140.69) ppm.

Hetero-nuclear couplings of protons with carbon atoms through two or more bonds have been determined by  $^1\text{H}$ - $^{13}\text{C}$  HMBC spectroscopy for the following pairs in a compound: H19-C17 (6.28, 116.38), H19-C20 (6.28, 150.54); H9-C4 (2.47, 114.10), H9-C3 (2.47, 157.09), H9-C5 (2.47, 175.02); H6-C4 (2.10, 114.11), H6-C3 (2.10, 158.22) and H23-C20 (1.78, 150.54) ppm.

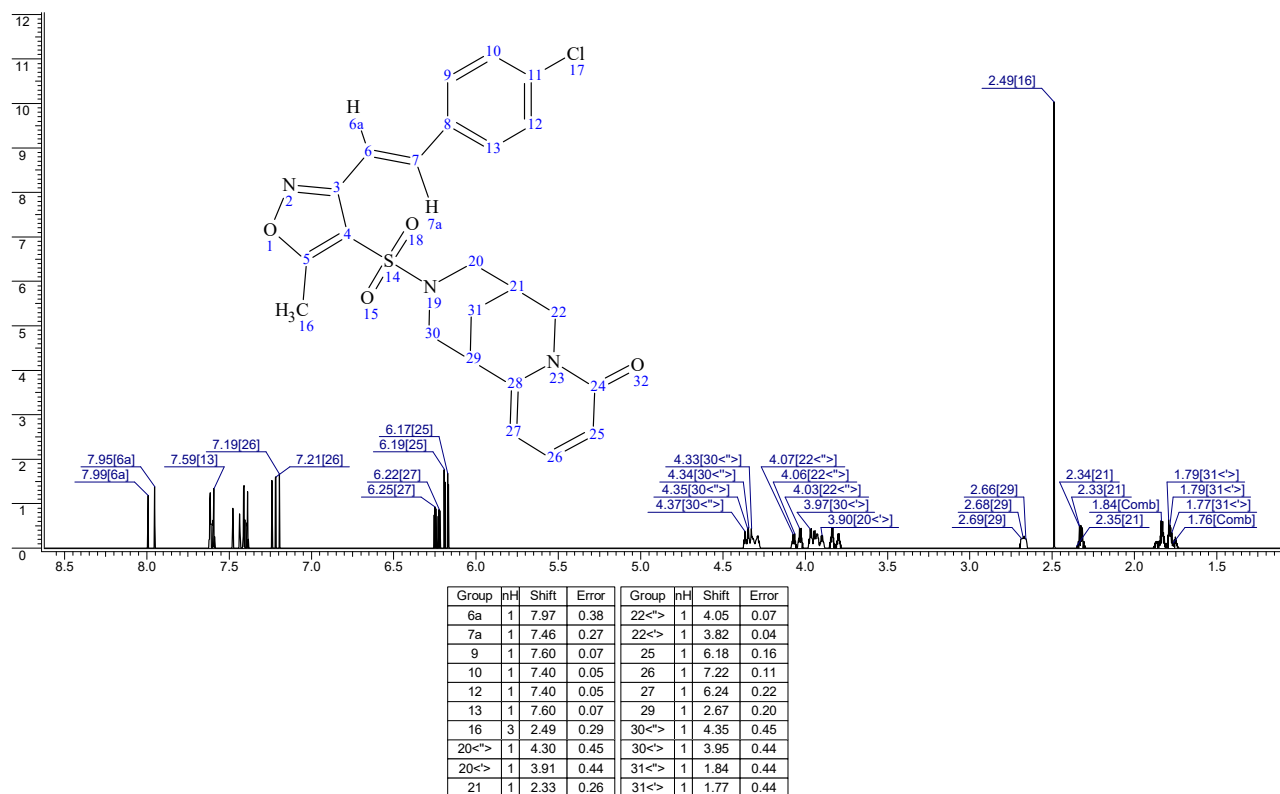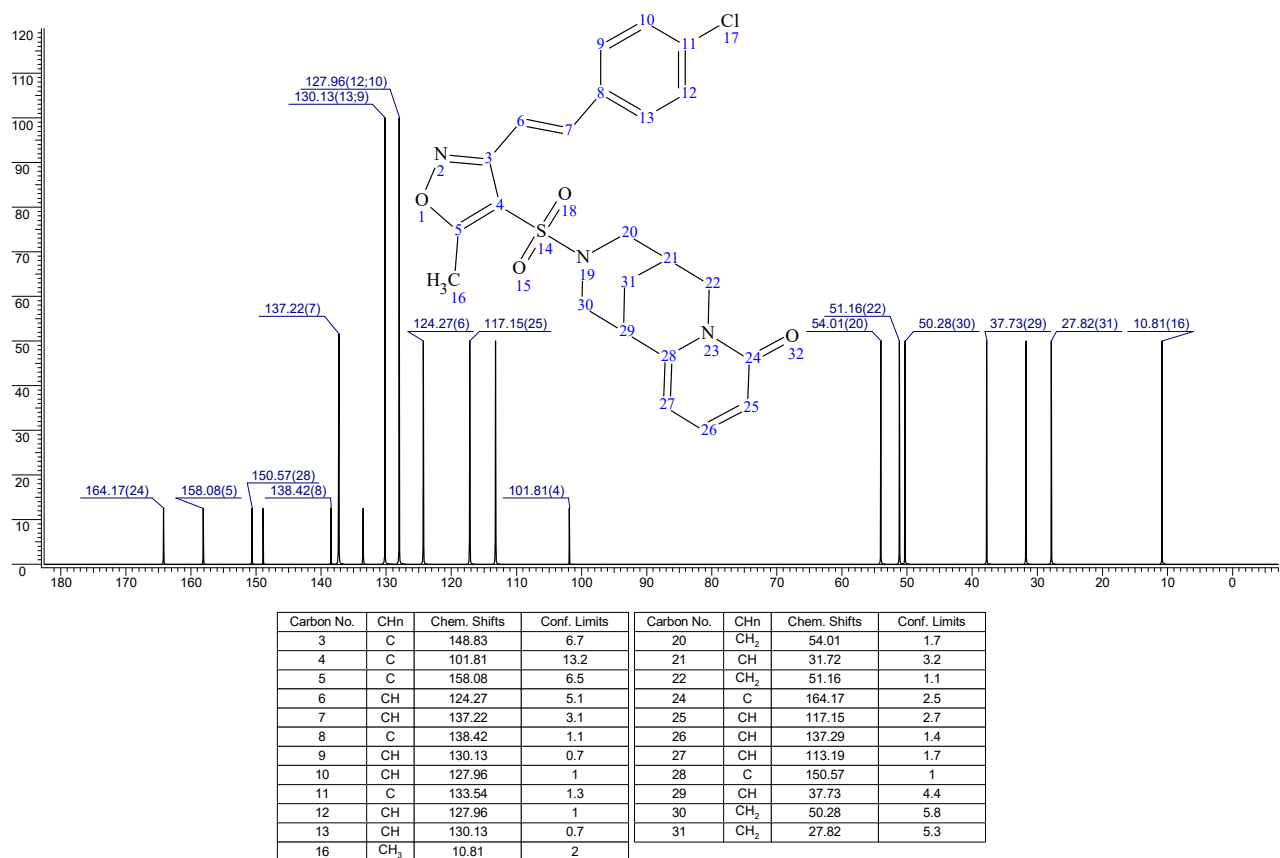

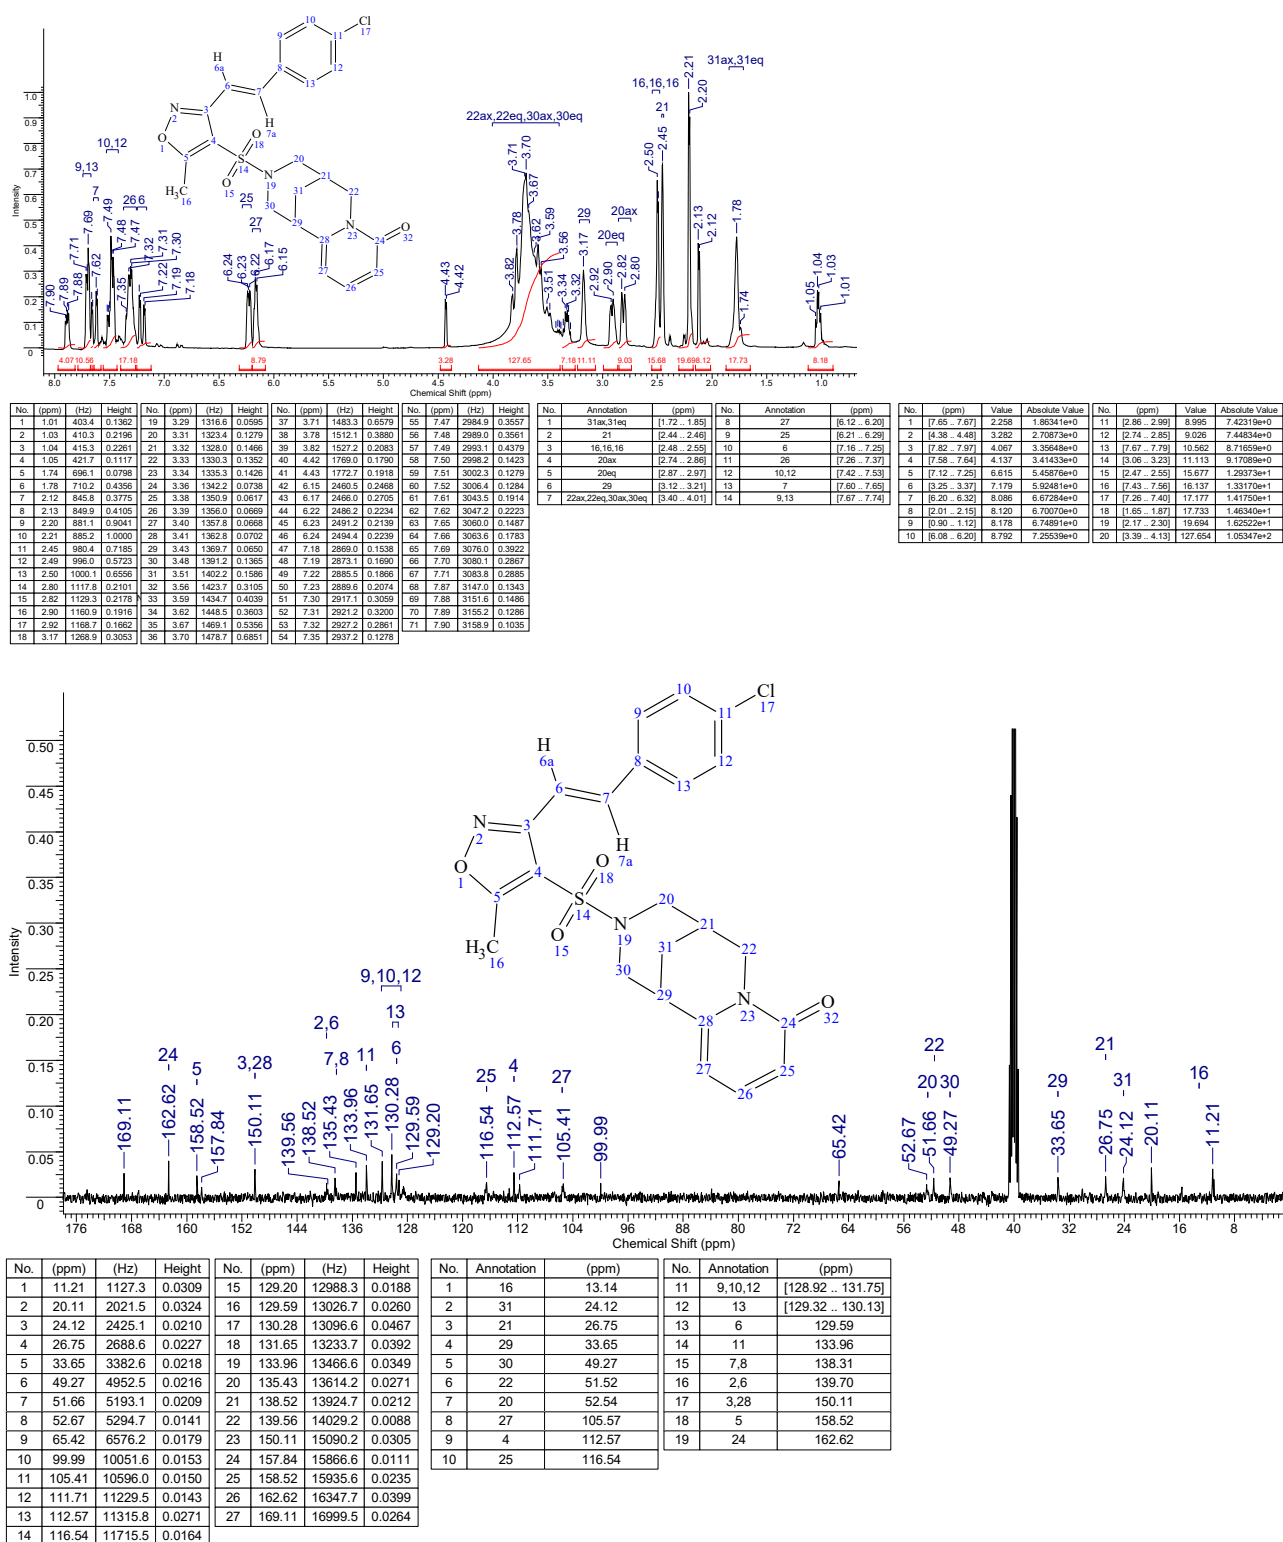

**Figure S6.**  $^1\text{H}$  (399.78 MHz, DMSO- $d_6$ ) and  $^{13}\text{C}$  (100.53 MHz, DMSO- $d_6$ ) NMR Spectra of **3**

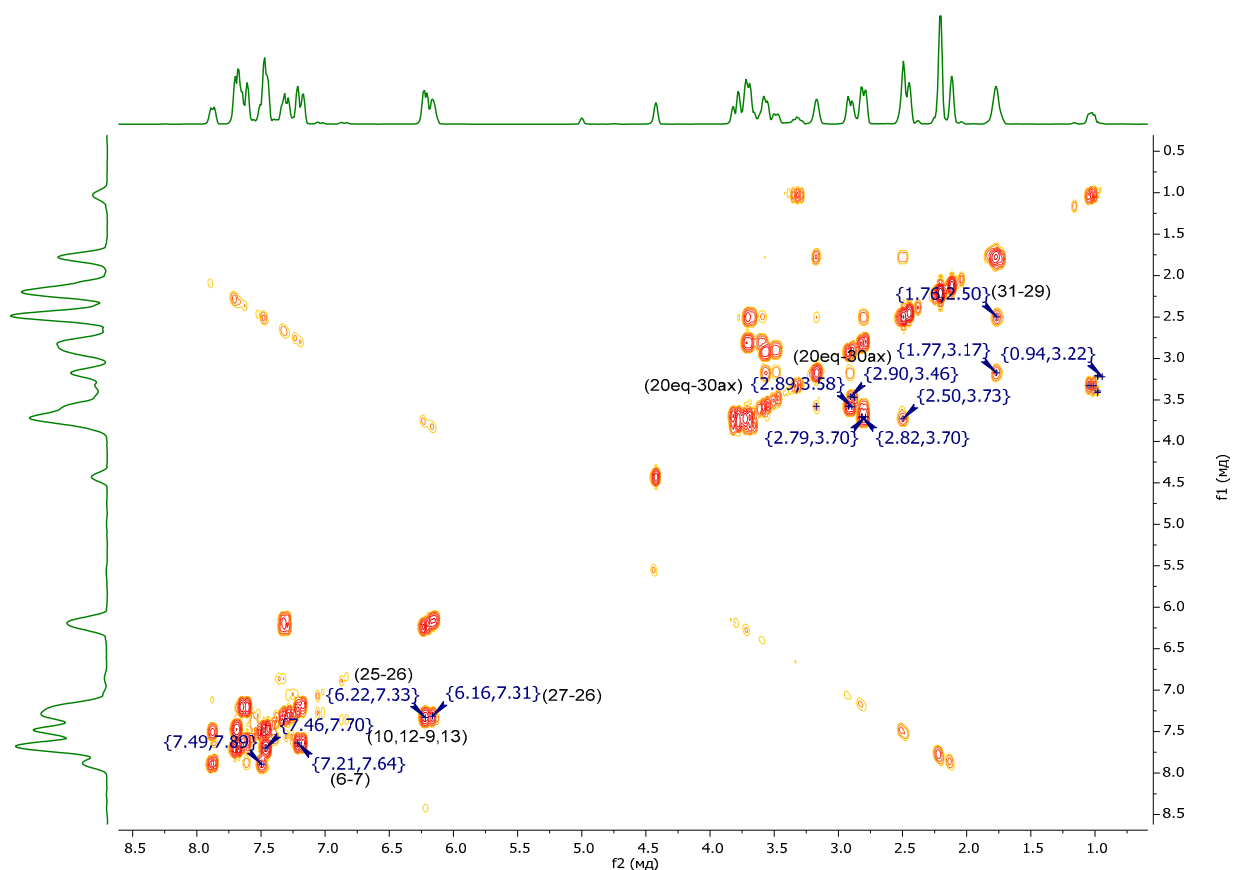

Figure S7. Cosy of 3 in\_DMSO

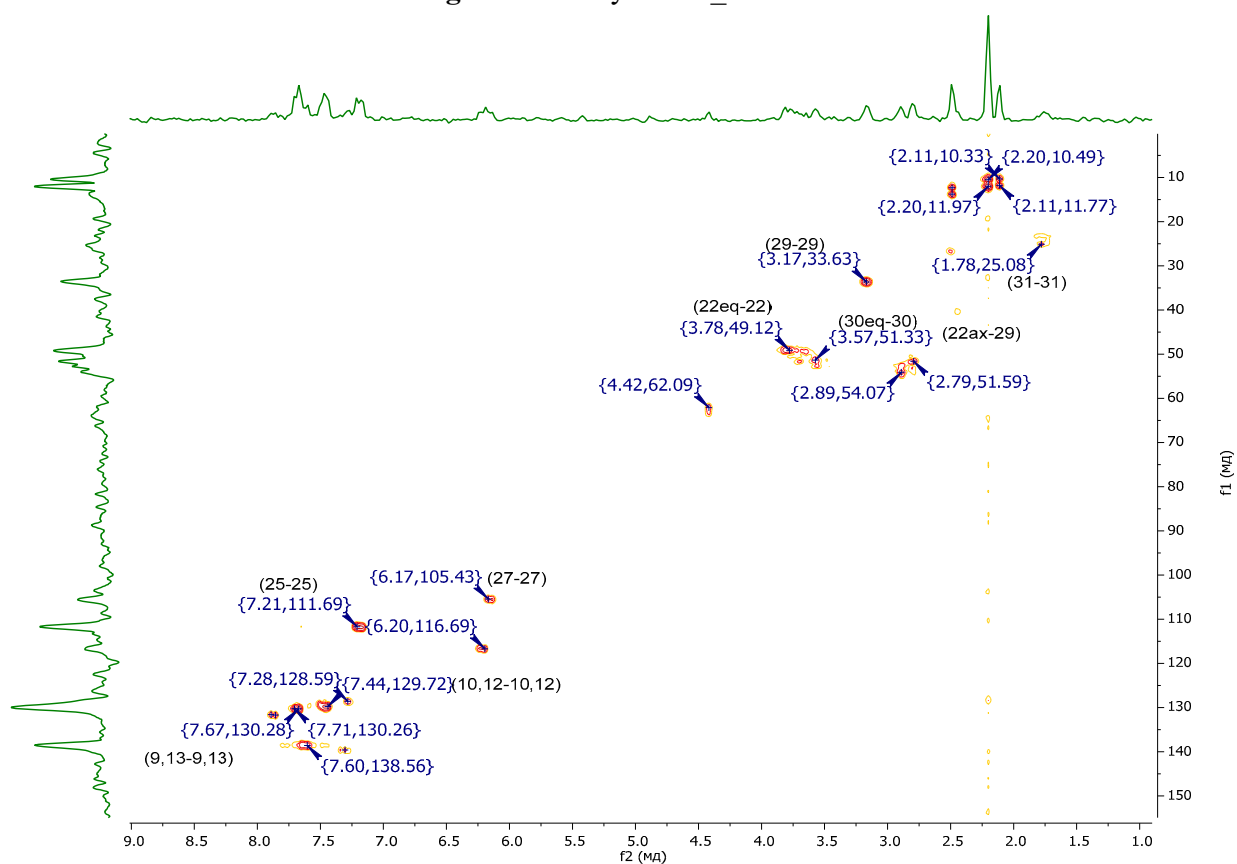

Figure S8 Hmqc of 3 in\_DMSO

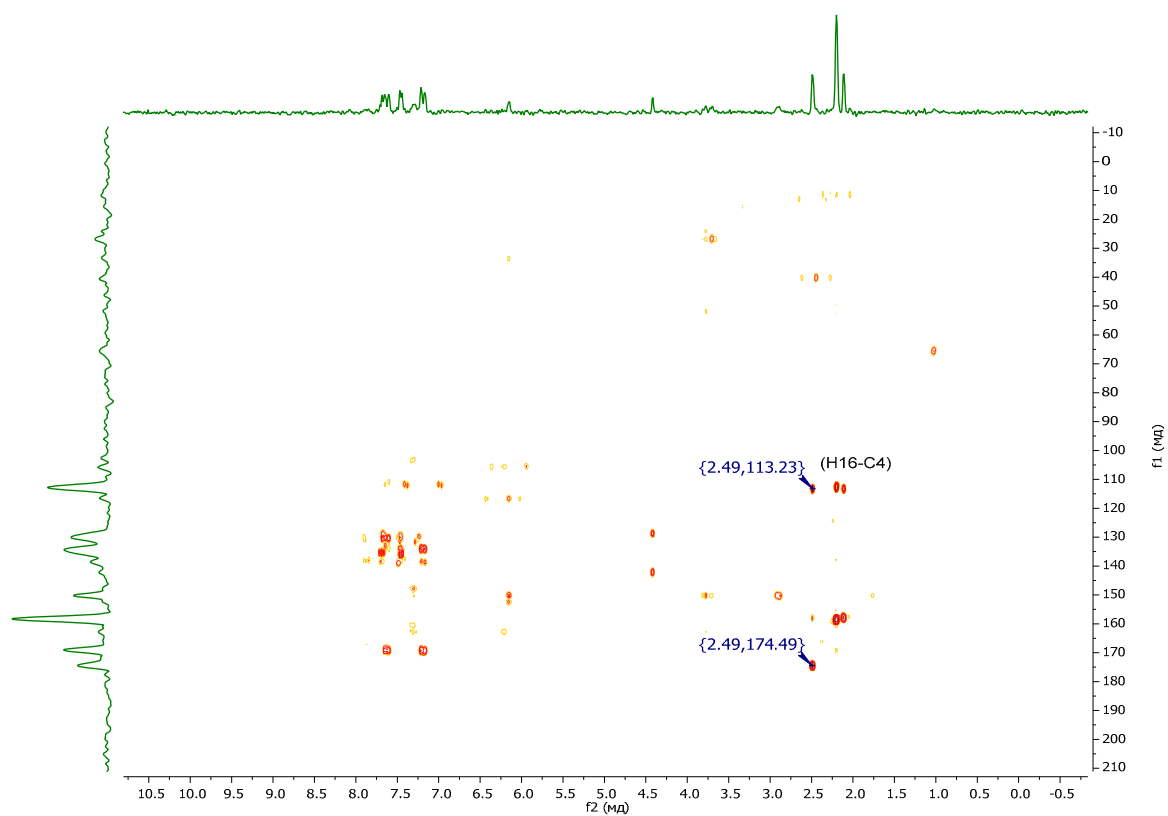

**Figure S9.** Hmbc of **3** in\_DMSO

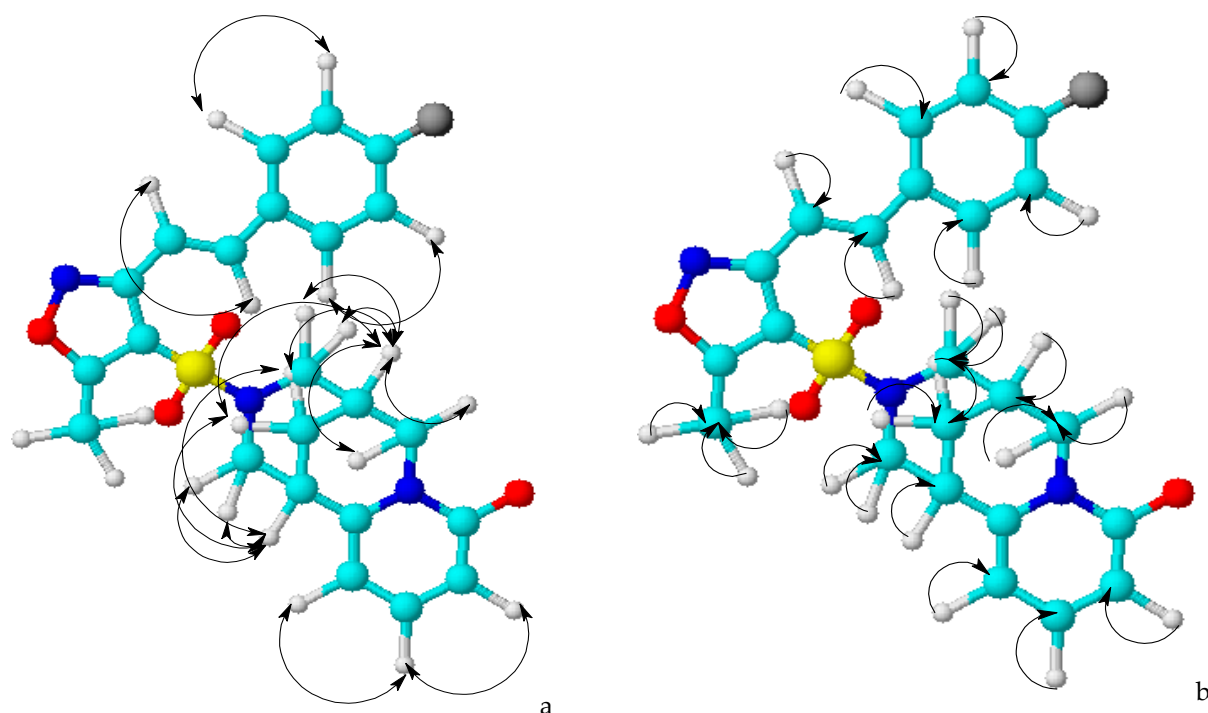

**Figure S10.** The structural correlations in COSY (a) and HMQC (b) spectra of compound **3**

The  $^1\text{H}$ - $^1\text{H}$  COSY spectra of compound **3** have been as follows: has demonstrated the spin-spin correlations through three proton bonds of near methylene-methylene, methine-methylene and methine-methine groups of H31-H29 (1.76, 3.16 and 3.16, 1.76), H20eq-H30eq (2.90, 3.58 and 3.58, 2.90), H20eq-H30ax (2.88, 3.49 and 3.49, 2.88), H25-H26 (6.21, 7.33 and 7.33, 6.21), H27-H26 (6.16, 7.32 and 7.32, 6.16), H6-H7 (7.20, 7.63 and 7.63, 7.20) and H10,12-H9,13 (7.46, 7.70 and 7.70, 7.46) ppm.

Hetero-nuclear couplings of protons with carbon atoms through a single bond have been established by  $^1\text{H}$ - $^{13}\text{C}$  HMQC spectroscopy for the following pairs in a compound: H31-C31 (1.76, 24.48), H21-C21 (2.8, 26.78), H16-C16 (2.49, 13.01), H20ax-C20 (2.78, 52.03), H20eq-C20 (2.90, 51.61), H22ax-C22 (3.53, 51.61), H22eq-C22 (3.70, 51.61), H29-C29 (3.16, 33.87), H30ax-C30 (3.49, 49.81), H30eq-C30 (3.60, 50.20), H26-C26 (7.31, 140.08), H7-C7 (7.63, 138.62), H6-C6 (7.20, 128.82), H25-C25 (6.22, 117.13), H27-C27 (6.16, 105.65), H10,12-C10,12 (7.45, 130.07) and H9,13-C9,13 (7.69, 130.28) ppm.

Hetero-nuclear couplings of protons with carbon atoms through two or more bonds have been determined by  $^1\text{H}$ - $^{13}\text{C}$  HMBC spectroscopy for the following pairs in a compound: H16-C4 (2.49, 113.39) ppm.

## Copies of MS Spectra of Products

MIN-1 #1242 RT: 22.51 AV: 1 NL: 8.97E5  
T: + c Full ms [40,00-500,00]

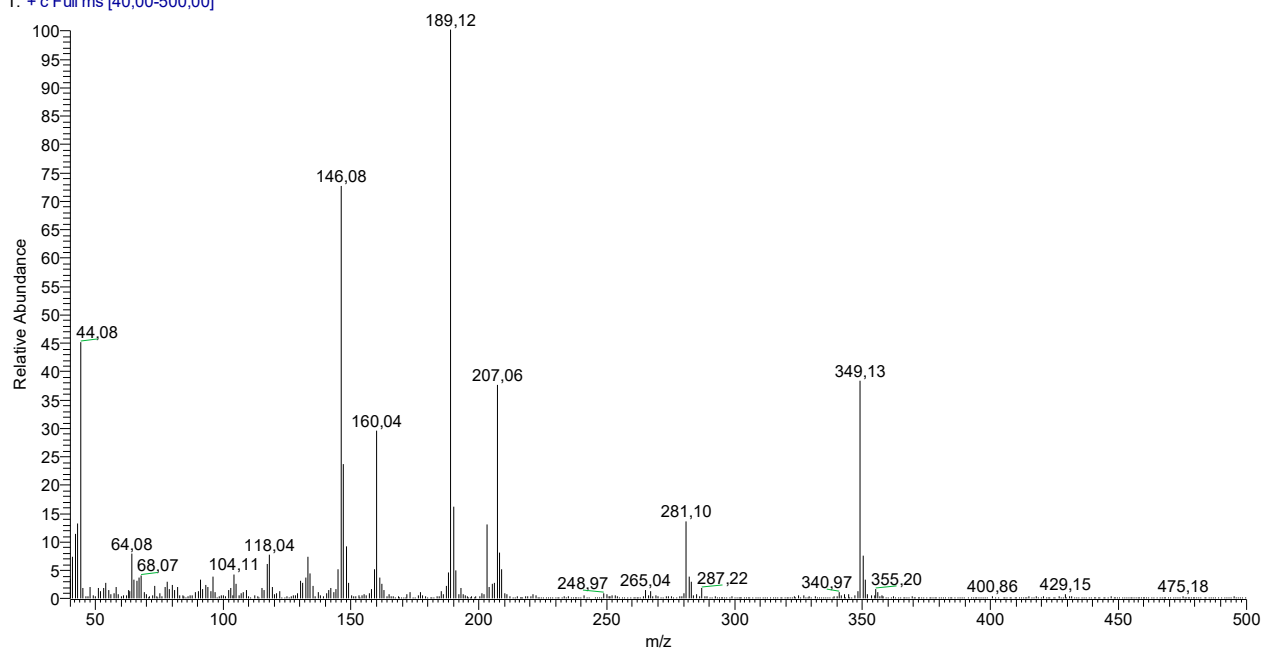

Figure S11. Mass spectrum of 2

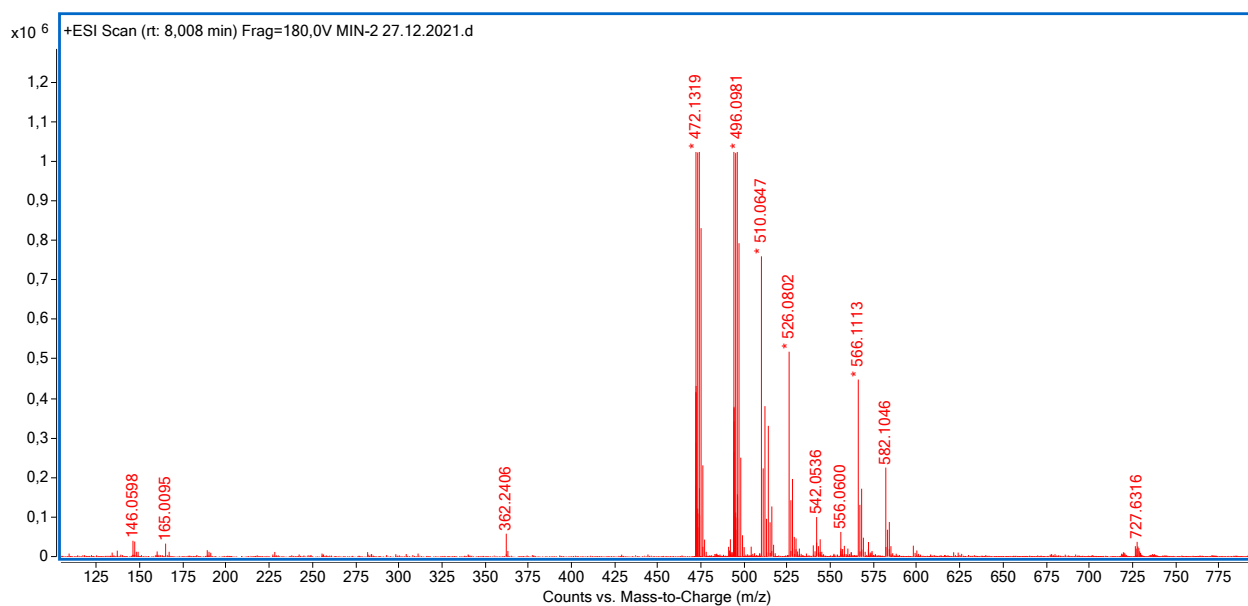

Figure S12. Mass spectrum of 3

## X-Ray Structural Study of Product 2

The cell parameters and intensities of 8569 reflections (3147 independent,  $R_{int} = 0.029$ ) have been measured on Bruker KARRA APEX2 CCD (MoK $\alpha$ ) diffractometer, graphite monochromator,  $\varphi, \theta$ -scanning,  $2.721^\circ < \theta < 25.990^\circ$ ) at a temperature of 296 K.

Crystals 2 has been monoclinic, a space group  $P2_1$ ,  $a = 6.6291(3)$  Å,  $b = 8.9064(5)$  Å,  $c = 13.9604(7)$  Å,  $\beta = 98.093(2)^\circ$ ,  $V = 816.03(7)$  Å<sup>3</sup>,  $Z = 2$  (C<sub>16</sub>H<sub>19</sub>N<sub>3</sub>O<sub>4</sub>S),  $M = 349.40$  g/mol,  $d_{calc} = 1.422$  g/cm<sup>3</sup>,  $\mu = 0.225$  mm<sup>-1</sup>. The array of measured intensities has been processed. Ab-sorption corrections have been performed using the SAINT [24] and SADABS pro-grams included in APEX2 software package (multiscan,  $T_{min} = 0.871$ ,  $T_{max} = 0.904$ ).

Structure has been decoded with a direct method. Positions of the non-hydrogen atoms have been clarified in the anisotropic approximation by the full matrix MNA. Hydrogen atoms have been placed in the geometrically calculated positions. Their positions have been refined in the isotropic approximation with the fixed positional and thermal parameters (a “rider” model). Calculations have used 2944 independent reflections with  $I > 2\sigma(I)$ . The number of the refined parameters has been 219. Final divergence factors have been  $R1 = 0.0317$ ,  $wR2 = 0.0749$  for reflections with  $I > 2\sigma(I)$ ,  $R1 = 0.0359$ ,  $wR2 = 0.0784$  for all reflections,  $GOOF = 0.990$ . The residual density peaks:  $\Delta\rho = 0.184$  e/Å<sup>3</sup> and  $-0.204$  e/Å<sup>3</sup>. Structure has been decoded and refined with using the programs of SHELXT-2014/5 and SHELXL-2018/3. The X-ray diffraction data in the form of a CIF file has been deposited in the Cambridge Crystallographic Data Center (CCDC 2168324).

**Table 1.** Bond lengths (d, Å) in molecule 2

| Bond       | d        | Bond         | d        |
|------------|----------|--------------|----------|
| S(1)-O(3)  | 1.424(2) | C(9)-C(13)   | 1.523(4) |
| S(1)-O(2)  | 1.427(2) | C(9)-H(9A)   | 0.9800   |
| S(1)-N(12) | 1.634(2) | C(10)-H(10A) | 0.9700   |
| S(1)-C(4') | 1.749(3) | C(10)-H(10B) | 0.9700   |
| O(1)-C(2)  | 1.231(3) | C(11)-N(12)  | 1.472(4) |
| N(1)-C(6)  | 1.372(3) | C(11)-H(11A) | 0.9700   |
| N(1)-C(2)  | 1.400(3) | C(11)-H(11B) | 0.9700   |
| N(1)-C(10) | 1.487(3) | N(12)-C(13)  | 1.484(3) |
| C(2)-C(3)  | 1.427(4) | C(13)-H(13A) | 0.9700   |
| C(3)-C(4)  | 1.348(5) | C(13)-H(13B) | 0.9700   |
| C(3)-H(3B) | 0.9300   | O(1')-C(5')  | 1.334(4) |
| C(4)-C(5)  | 1.396(4) | O(1')-N(2')  | 1.418(4) |
| C(4)-H(4A) | 0.9300   | N(2')-C(3')  | 1.304(4) |
| C(5)-C(6)  | 1.362(4) | C(3')-C(4')  | 1.412(4) |
| C(5)-H(5A) | 0.9300   | C(3')-C(6')  | 1.475(6) |
| C(6)-C(7)  | 1.500(4) | C(4')-C(5')  | 1.372(4) |
| C(7)-C(8)  | 1.526(4) | C(5')-C(7')  | 1.480(5) |
| C(7)-C(11) | 1.532(4) | C(6')-H(6'A) | 0.9600   |
| C(7)-H(7A) | 0.9800   | C(6')-H(6'B) | 0.9600   |
| C(8)-C(9)  | 1.515(5) | C(6')-H(6'C) | 0.9600   |
| C(8)-H(8A) | 0.9700   | C(7')-H(7'A) | 0.9600   |
| C(8)-H(8B) | 0.9700   | C(7')-H(7'B) | 0.9600   |
| C(9)-C(10) | 1.512(4) | C(7')-H(7'C) | 0.9600   |

**Table 2.** Bond angles ( $\omega$ , deg.) in molecule **2**

| Angle            | $\omega$   | Angle               | $\omega$   |
|------------------|------------|---------------------|------------|
| O(3)-S(1)-O(2)   | 120.01(14) | N(1)-C(10)-H(10A)   | 108.6      |
| O(3)-S(1)-N(12)  | 107.74(13) | C(9)-C(10)-H(10A)   | 108.6      |
| O(2)-S(1)-N(12)  | 107.29(13) | N(1)-C(10)-H(10B)   | 108.6      |
| O(3)-S(1)-C(4')  | 106.65(14) | C(9)-C(10)-H(10B)   | 108.6      |
| O(2)-S(1)-C(4')  | 107.25(14) | H(10A)-C(10)-H(10B) | 107.6      |
| N(12)-S(1)-C(4') | 107.31(12) | N(12)-C(11)-C(7)    | 108.9(2)   |
| C(6)-N(1)-C(2)   | 123.0(2)   | N(12)-C(11)-H(11A)  | 109.9      |
| C(6)-N(1)-C(10)  | 123.5(2)   | C(7)-C(11)-H(11A)   | 109.9      |
| C(2)-N(1)-C(10)  | 113.4(2)   | N(12)-C(11)-H(11B)  | 109.9      |
| O(1)-C(2)-N(1)   | 119.6(3)   | C(7)-C(11)-H(11B)   | 109.9      |
| O(1)-C(2)-C(3)   | 124.8(3)   | H(11A)-C(11)-H(11B) | 108.3      |
| N(1)-C(2)-C(3)   | 115.6(3)   | C(11)-N(12)-C(13)   | 113.4(2)   |
| C(4)-C(3)-C(2)   | 121.2(3)   | C(11)-N(12)-S(1)    | 117.54(17) |
| C(4)-C(3)-H(3B)  | 119.4      | C(13)-N(12)-S(1)    | 115.02(19) |
| C(2)-C(3)-H(3B)  | 119.4      | N(12)-C(13)-C(9)    | 109.5(2)   |
| C(3)-C(4)-C(5)   | 120.8(3)   | N(12)-C(13)-H(13A)  | 109.8      |
| C(3)-C(4)-H(4A)  | 119.6      | C(9)-C(13)-H(13A)   | 109.8      |
| C(5)-C(4)-H(4A)  | 119.6      | N(12)-C(13)-H(13B)  | 109.8      |
| C(6)-C(5)-C(4)   | 120.1(3)   | C(9)-C(13)-H(13B)   | 109.8      |
| C(6)-C(5)-H(5A)  | 120.0      | H(13A)-C(13)-H(13B) | 108.2      |
| C(4)-C(5)-H(5A)  | 120.0      | C(5')-O(1')-N(2')   | 108.7(2)   |
| C(5)-C(6)-N(1)   | 119.3(2)   | C(3')-N(2')-O(1')   | 106.7(3)   |
| C(5)-C(6)-C(7)   | 122.0(2)   | N(2')-C(3')-C(4')   | 110.1(3)   |
| N(1)-C(6)-C(7)   | 118.7(2)   | N(2')-C(3')-C(6')   | 118.5(3)   |
| C(6)-C(7)-C(8)   | 110.9(2)   | C(4')-C(3')-C(6')   | 131.4(3)   |
| C(6)-C(7)-C(11)  | 111.1(2)   | C(5')-C(4')-C(3')   | 105.9(3)   |
| C(8)-C(7)-C(11)  | 109.8(2)   | C(5')-C(4')-S(1)    | 126.7(2)   |
| C(6)-C(7)-H(7A)  | 108.3      | C(3')-C(4')-S(1)    | 127.4(2)   |
| C(8)-C(7)-H(7A)  | 108.3      | O(1')-C(5')-C(4')   | 108.6(3)   |
| C(11)-C(7)-H(7A) | 108.3      | O(1')-C(5')-C(7')   | 117.0(3)   |
| C(9)-C(8)-C(7)   | 106.5(2)   | C(4')-C(5')-C(7')   | 134.4(3)   |
| C(9)-C(8)-H(8A)  | 110.4      | C(3')-C(6')-H(6'A)  | 109.5      |
| C(7)-C(8)-H(8A)  | 110.4      | C(3')-C(6')-H(6'B)  | 109.5      |
| C(9)-C(8)-H(8B)  | 110.4      | H(6'A)-C(6')-H(6'B) | 109.5      |
| C(7)-C(8)-H(8B)  | 110.4      | C(3')-C(6')-H(6'C)  | 109.5      |
| H(8A)-C(8)-H(8B) | 108.6      | H(6'A)-C(6')-H(6'C) | 109.5      |
| C(10)-C(9)-C(8)  | 111.1(2)   | H(6'B)-C(6')-H(6'C) | 109.5      |
| C(10)-C(9)-C(13) | 112.2(2)   | C(5')-C(7')-H(7'A)  | 109.5      |
| C(8)-C(9)-C(13)  | 110.4(2)   | C(5')-C(7')-H(7'B)  | 109.5      |
| C(10)-C(9)-H(9A) | 107.6      | H(7'A)-C(7')-H(7'B) | 109.5      |
| C(8)-C(9)-H(9A)  | 107.6      | C(5')-C(7')-H(7'C)  | 109.5      |
| C(13)-C(9)-H(9A) | 107.6      | H(7'A)-C(7')-H(7'C) | 109.5      |
| N(1)-C(10)-C(9)  | 114.4(2)   | H(7'B)-C(7')-H(7'C) | 109.5      |

**Table 3.** Torsion angles ( $\tau$ , deg.) in molecule **2**

| Angle                  | $\tau$      | Angle                   | $\tau$    |
|------------------------|-------------|-------------------------|-----------|
| C(6)-N(1)-C(2)-O(1)    | 179.4(2)    | O(3)-S(1)-N(12)-C(11)   | 168.7(2)  |
| C(10)-N(1)-C(2)-O(1)   | 1.6(4)      | O(2)-S(1)-N(12)-C(11)   | 38.1(2)   |
| C(6)-N(1)-C(2)-C(3)    | -0.9(4)     | C(4')-S(1)-N(12)-C(11)  | -76.8(2)  |
| C(10)-N(1)-C(2)-C(3)   | -178.7(2)   | O(3)-S(1)-N(12)-C(13)   | -53.9(2)  |
| O(1)-C(2)-C(3)-C(4)    | -178.3(3)   | O(2)-S(1)-N(12)-C(13)   | 175.6(2)  |
| N(1)-C(2)-C(3)-C(4)    | 2.0(4)      | C(4')-S(1)-N(12)-C(13)  | 60.6(2)   |
| C(2)-C(3)-C(4)-C(5)    | -1.2(5)     | C(11)-N(12)-C(13)-C(9)  | -56.2(3)  |
| C(3)-C(4)-C(5)-C(6)    | -0.9(5)     | S(1)-N(12)-C(13)-C(9)   | 164.5(2)  |
| C(4)-C(5)-C(6)-N(1)    | 1.9(4)      | C(10)-C(9)-C(13)-N(12)  | -66.1(3)  |
| C(4)-C(5)-C(6)-C(7)    | -177.7(3)   | C(8)-C(9)-C(13)-N(12)   | 58.4(3)   |
| C(2)-N(1)-C(6)-C(5)    | -1.1(4)     | C(5')-O(1')-N(2')-C(3') | -0.2(4)   |
| C(10)-N(1)-C(6)-C(5)   | 176.5(3)    | O(1')-N(2')-C(3')-C(4') | 0.4(4)    |
| C(2)-N(1)-C(6)-C(7)    | 178.6(2)    | O(1')-N(2')-C(3')-C(6') | 178.5(4)  |
| C(10)-N(1)-C(6)-C(7)   | -3.8(3)     | N(2')-C(3')-C(4')-C(5') | -0.4(4)   |
| C(5)-C(6)-C(7)-C(8)    | -148.2(3)   | C(6')-C(3')-C(4')-C(5') | -178.2(4) |
| N(1)-C(6)-C(7)-C(8)    | 32.1(3)     | N(2')-C(3')-C(4')-S(1)  | 178.4(2)  |
| C(5)-C(6)-C(7)-C(11)   | 89.3(3)     | C(6')-C(3')-C(4')-S(1)  | 0.6(6)    |
| N(1)-C(6)-C(7)-C(11)   | -90.3(3)    | O(3)-S(1)-C(4')-C(5')   | 29.7(3)   |
| C(6)-C(7)-C(8)-C(9)    | -60.9(3)    | O(2)-S(1)-C(4')-C(5')   | 159.4(3)  |
| C(11)-C(7)-C(8)-C(9)   | 62.3(3)     | N(12)-S(1)-C(4')-C(5')  | -85.6(3)  |
| C(7)-C(8)-C(9)-C(10)   | 63.5(3)     | O(3)-S(1)-C(4')-C(3')   | -148.9(3) |
| C(7)-C(8)-C(9)-C(13)   | -61.6(3)    | O(2)-S(1)-C(4')-C(3')   | -19.1(3)  |
| C(6)-N(1)-C(10)-C(9)   | 5.7(4)      | N(12)-S(1)-C(4')-C(3')  | 95.9(3)   |
| C(2)-N(1)-C(10)-C(9)   | -176.5(2)   | N(2')-O(1')-C(5')-C(4') | 0.0(3)    |
| C(8)-C(9)-C(10)-N(1)   | -36.3(3)    | N(2')-O(1')-C(5')-C(7') | -179.3(3) |
| C(13)-C(9)-C(10)-N(1)  | 87.8(3)     | C(3')-C(4')-C(5')-O(1') | 0.3(3)    |
| C(6)-C(7)-C(11)-N(12)  | 63.2(3)     | S(1)-C(4')-C(5')-O(1')  | -178.6(2) |
| C(8)-C(7)-C(11)-N(12)  | -59.9(3)    | C(3')-C(4')-C(5')-C(7') | 179.3(4)  |
| C(7)-C(11)-N(12)-C(13) | 56.9(3)     | S(1)-C(4')-C(5')-C(7')  | 0.5(5)    |
| C(7)-C(11)-N(12)-S(1)  | -164.97(18) |                         |           |
